# Supplementary material for: Integrative analysis reveals clinical phenotypes and oncogenic potentials of long non-coding RNAs across 15 cancer types
Source: PubMed Central journal article supplement (PMC5085208; doi:10.18632/oncotarget.9037), 2016-04-27
Supplement: oncotarget-07-35044-s001.pdf [file oncotarget-07-35044-s001.pdf]

SUPPLEMENTARY FIGURE AND TABLES

A

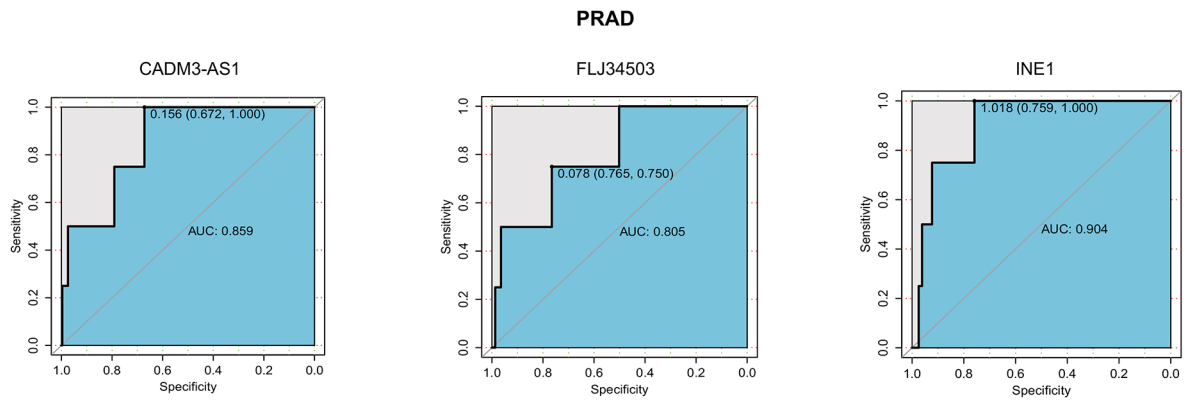

B

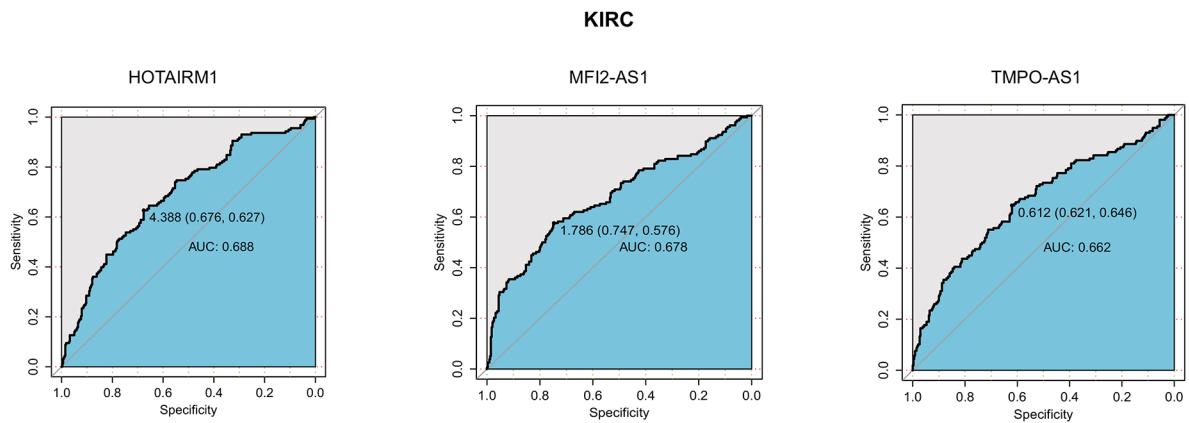

Supplementary Figure S1: ROC analysis of several representative prognostic lncRNAs. A. ROC curves of three most significant prognostic lncRNAs in PRAD. B. ROC curves of three most significant prognostic lncRNAs in KIRC.

**Supplementary Table S1: A summary of all specimens across 15 cancer types**

| <b>Distributions of all specimens across 15 cancer types</b> |              |               |
|--------------------------------------------------------------|--------------|---------------|
| <b>Type</b>                                                  | <b>Tumor</b> | <b>Normal</b> |
| Bladder Urothelial Carcinoma(BLCA)                           | 267          | 19            |
| Breast invasive carcinoma(BRCA)                              | 1066         | 113           |
| Colon and rectum adenocarcinoma(COADREAD)                    | 609          | 51            |
| Glioblastoma multiforme(GBM)                                 | 168          | 5             |
| Head and Neck squamous cell carcinoma(HNSC)                  | 481          | 44            |
| Kidney Chromophobe(KICH)                                     | 66           | 25            |
| Kidney renal clear cell carcinoma(KIRC)                      | 532          | 72            |
| Kidney renal papillary cell carcinoma(KIRP)                  | 226          | 32            |
| Liver hepatocellular carcinoma(LIHC)                         | 212          | 50            |
| Lung adenocarcinoma(LUAD)                                    | 491          | 59            |
| Lung squamous cell carcinoma(LUSC)                           | 489          | 51            |
| Prostate adenocarcinoma(PRAD)                                | 419          | 52            |
| Stomach adenocarcinoma(STAD)                                 | 146          | 37            |
| Thyroid carcinoma(THCA)                                      | 506          | 59            |
| Uterine Corpus Endometrial Carcinoma(UCEC)                   | 528          | 35            |

**Supplementary Table S2: Dysregulated lncRNAs across 15 cancer types**

See Supplementary File 1

**Supplementary Table S3: Survival-associated lncRNAs across 15 cancer types**

See Supplementary File 2

**Supplementary Table S4: The lncRNAs that expressions are positively correlated with gene copy number and located in recurrent SCNA regions across 15 cancer types**

See Supplementary File 3

**Supplementary Table S5: 116 dysregulated lncRNAs are strikingly genomic altered across 15 cancer types**

See Supplementary File 4

**Supplementary Table S6: Summarized clinical information of analyzed 15 cancer types**

See Supplementary File 5

**Supplementary Table S7: A summary of the 985 lncRNAs that were analyzed in the present study**

See Supplementary File 6

Supplementary Table S8: Primers used for q-PCR

| Primer List      |                       |
|------------------|-----------------------|
| Primer           | Sequence(5'-3')       |
| SNHG15-F         | GCCTGCCTGTGTTAATAC    |
| SNHG15-R         | AATTCCTGACTCCTTCCA    |
| SLCO4A1-AS1-F    | GATGAACGCAACTCTGAA    |
| SLCO4A1-AS1-R    | CGTCTGTTCTGATTCTTC    |
| MAFG-AS1-F       | GTGTTCCGTGGTCAGTGA    |
| MAFG-AS1-R       | CAAGTGCCTGGGCTCTC     |
| $\beta$ -actin-F | GAAACTACCTTCAACTCCATC |
| $\beta$ -actin-R | CGAGGCCAGGATGGAGCCGCC |
